# Supplementary material for: Total Suspended Particulate Matter (TSP)-Bound Carbonaceous Components in a Roadside Area in Eastern Indonesia
Source: MDPI journal article supplement (doi:10.3390/urbansci8020037), 2024-04-22
Supplement: s1 [file s1]

## List of Supplementary Material

### Total suspended particulate matter (TSP)-bound carbonaceous components in a roadside area in Eastern Indonesia

Muhammad Amin<sup>1,2\*</sup>, Andi Annisa Tenri Ramadhani<sup>3</sup>, Rasdiana Zakaria<sup>3</sup>, Zarah Arwieny Hanami<sup>3</sup>, Rahmi Mulia Putri<sup>4</sup>, Worradorn Phairuang<sup>1,5\*</sup>, Mitsuhiko Hata<sup>1</sup>, Masami Furuuchi<sup>1</sup>

<sup>1</sup>Faculty of Geosciences and Civil Engineering, Institute of Science and Engineering, Kanazawa University, Kanazawa, Ishikawa, 920-1192, Japan

<sup>2</sup>Faculty of Engineering, Maritim University of Raja Ali Haji, Tanjung Pinang, Kepulauan Riau, 29115, Indonesia

<sup>3</sup>Environmental Engineering Department, Faculty of Engineering, Universitas Hasanuddin, Gowa, South Sulawesi 92171, Indonesia

<sup>4</sup>Graduate School of Natural Science and Technology, Kanazawa University, Kanazawa, Ishikawa, 920-1192, Japan

<sup>5</sup>Department of Geography, Faculty of Social Sciences, Chiang Mai University, Muang, Chiang Mai 50200, Thailand

**Corresponding author:** muh-amin@se.kanazawa-u.ac.jp (MA); pworradorn@se.kanazawa-u.ac.jp (WP)

**Table S1.** Meteorological condition during the sampling period in each site, in Sultan Alauddin Street, Makassar city, South Sulawesi, Eastern region Indonesia

| Location | Times           | Parameter      |                  |              |                     |
|----------|-----------------|----------------|------------------|--------------|---------------------|
|          |                 | Pressure (hpa) | Temperature (°C) | Humidity (%) | Wind velocity (m/s) |
| PA       | Morning         | 1013.33        | 29.55            | 75.18        | 0.94                |
|          | Noon            | 1011.73        | 28.14            | 84.27        | 0.83                |
|          | Late noon-night | 1010.41        | 26.38            | 86.15        | 0.96                |
| GR       | Morning         | 1012.15        | 29.66            | 70.48        | 1.31                |
|          | Noon            | 1010.50        | 31.94            | 65.28        | 0.99                |
|          | Late noon-night | 1010.58        | 27.78            | 80.78        | 2.36                |
| PP       | Morning         | 1013.00        | 32.33            | 59.97        | 1.25                |
|          | Noon            | 1009.83        | 39.45            | 40.22        | 1.50                |
|          | Late noon-night | 1010.29        | 31.07            | 66.08        | 1.88                |
| UP       | Morning         | 1012.20        | 33.00            | 59.98        | 1.12                |
|          | Noon            | 1009.22        | 34.66            | 55.15        | 1.28                |
|          | Late noon-night | 1009.76        | 28.35            | 75.20        | 0.86                |

**Table S2.** Primary and secondary organic carbon (POC and SOC) in Sultan Alauddin Street, Makassar city, South Sulawesi, Eastern region Indonesia

| Location | Period    | POC ( $\mu\text{g}/\text{m}^3$ ) | SOC ( $\mu\text{g}/\text{m}^3$ ) | POC/SOC (-) |
|----------|-----------|----------------------------------|----------------------------------|-------------|
| PA       | Morning   | 6.7                              | 3.0                              | 2.3         |
|          | Noon      | 6.6                              | 4.1                              | 3.0         |
|          | Late-noon | 5.8                              | 1.1                              | 6.2         |
| GR       | Morning   | 17.6                             | 11.0                             | 1.6         |
|          | Noon      | 2.8                              | 3.9                              | 0.9         |
|          | Late-noon | 25.5                             | 7.7                              | 3.4         |
| PP       | Morning   | 17.2                             | 5.6                              | 3.5         |
|          | Noon      | 17.0                             | 10.2                             | 3.1         |
|          | Late-noon | 26.8                             | 6.3                              | 4.3         |
| UP       | Morning   | 11.7                             | 8.1                              | 1.6         |
|          | Noon      | 9.4                              | 4.6                              | 2.1         |
|          | Late-noon | 18.5                             | 11.1                             | 1.7         |

**Description:**

To separate and quantify the POC and SOC is very challenging due to no simple direct analytical technique to solve this issue. Commonly indirect methods are used to calculate the SOC such as by using the EC tracer method. In this study, we used this method to estimate the level of SOC in TSP in Makassar city.

$$\text{OC}_{\text{total}} = \text{POC} + \text{SOC}$$

where POC is derived as:

$$\text{POC} = (\text{OC}/\text{EC})_{\text{min}} * \text{EC}_{\text{total}}$$

**Table S3.** Inhalation dose based on elemental carbon in Sultan Alauddin Street, Makassar city, South Sulawesi, Eastern region Indonesia

| Location | Period    | EC<br>( $\mu\text{g}/\text{m}^3$ ) | Inhalation<br>rate (IR)<br>Adult | Inhalation<br>rate (IR)<br>Children | Time<br>exposure<br>(t) (hours) | Inhalation<br>Dose (D)<br>(Adult, 16–<br>61 years<br>old)( $\mu\text{g}$ ) | Inhalation<br>Dose (D)<br>(Children,<br>6–15 years<br>old)( $\mu\text{g}$ ) |
|----------|-----------|------------------------------------|----------------------------------|-------------------------------------|---------------------------------|----------------------------------------------------------------------------|-----------------------------------------------------------------------------|
| PA       | Morning   | 3.94                               | 0.0111                           | 0.0094                              | 8                               | 0.35                                                                       | 0.30                                                                        |
|          |           | $\pm 0.68$                         |                                  |                                     |                                 | $\pm 0.06$                                                                 | $\pm 0.05$                                                                  |
|          | Afternoon | 3.83                               | 0.0111                           | 0.0094                              | 8                               | 0.34                                                                       | 0.2                                                                         |
|          |           | $\pm 1.00$                         |                                  |                                     |                                 | $\pm 0.09$                                                                 | $9 \pm 0.07$                                                                |
|          | Late-noon | 3.36                               | 0.0111                           | 0.0094                              | 8                               | 0.30                                                                       | 0.25                                                                        |
|          |           | $\pm 0.77$                         | 0.0111                           | 0.0094                              | 8                               | $\pm 0.07$                                                                 | $\pm 0.06$                                                                  |
| GR       | Morning   | 9.53                               | 0.0111                           | 0.0094                              | 8                               | 0.85                                                                       | 0.72                                                                        |
|          |           | $\pm 3.75$                         |                                  |                                     |                                 | $\pm 0.33$                                                                 | $\pm 0.28$                                                                  |
|          | Afternoon | 1.59                               | 0.0111                           | 0.0094                              | 8                               | 0.14                                                                       | 0.12                                                                        |
|          |           | $\pm 0.45$                         |                                  |                                     |                                 | $\pm 0.04$                                                                 | $\pm 0.03$                                                                  |
|          | Late-noon | 14.86                              | 0.0111                           | 0.0094                              | 8                               | <b>1.32</b>                                                                | <b>1.12</b>                                                                 |
|          |           | $\pm 4.95$                         | 0.0111                           | 0.0094                              | 8                               | <b><math>\pm 0.44</math></b>                                               | <b><math>\pm 0.37</math></b>                                                |
| PP       | Morning   | 10.06                              | 0.0111                           | 0.0094                              | 8                               | 0.89                                                                       | 0.76                                                                        |
|          |           | $\pm 0.78$                         |                                  |                                     |                                 | $\pm 0.07$                                                                 | $\pm 0.06$                                                                  |
|          | Afternoon | 8.35                               | 0.0111                           | 0.0094                              | 8                               | 0.74                                                                       | 0.63                                                                        |
|          |           | $\pm 2.85$                         |                                  |                                     |                                 | $\pm 0.25$                                                                 | $\pm 0.21$                                                                  |
|          | Late-noon | 15.62                              | 0.0111                           | 0.0094                              | 8                               | <b>1.39</b>                                                                | <b>1.17</b>                                                                 |
|          |           | $\pm 3.15$                         | 0.0111                           | 0.0094                              | 8                               | <b><math>\pm 0.28</math></b>                                               | <b><math>\pm 0.24</math></b>                                                |
| UP       | Morning   | 6.80                               | 0.0111                           | 0.0094                              | 8                               | 0.60                                                                       | 0.51                                                                        |
|          |           | $\pm 1.27$                         |                                  |                                     |                                 | $\pm 0.11$                                                                 | $\pm 0.10$                                                                  |
|          | Afternoon | 5.51                               | 0.0111                           | 0.0094                              | 8                               | 0.49                                                                       | 0.4                                                                         |
|          |           | $\pm 3.49$                         |                                  |                                     |                                 | $\pm 0.31$                                                                 | $1 \pm 0.26$                                                                |
|          | Late-noon | 10.82                              | 0.0111                           | 0.0094                              | 8                               | <b>0.96</b>                                                                | <b>0.81</b>                                                                 |
|          |           | $\pm 2.40$                         | 0.0111                           | 0.0094                              | 8                               | <b><math>\pm 0.21</math></b>                                               | <b><math>\pm 0.18</math></b>                                                |

#### Description:

To calculate the potential health risk due to of carbonaceous components, EC concentration was used to of its sources and characteristic. The following equation was applied.

$$D = C_p \times IR_{(\Delta t)} \times dt$$

Where  $D$  is the total inhalation dose ( $\mu\text{g}$ ) of EC,  $C_p$  is the concentration of EC ( $\mu\text{g}/\text{m}^3$ ),  $IR$  is the inhalation rate of human (average  $IR$  for males and females with ages of 16–61 years is  $0.0111 \text{ m}^3/\text{min}$  while for the children with age 6–15, the  $IR$  for male and female is  $0.0094 \text{ m}^3/\text{min}$ ) and  $dt$  is the exposure time of a person spending outside (8 hours was used as reported previously as the minimum time spent by a person outdoors) [US EPA, 2011]

U.S. EPA (Environmental Protection Agency). Exposure factors handbook: 2011 edition. National Center for Environmental Assessment, Washington, DC (2011) EPA/600/R-09/052F. Available from the National Technical Information Service, Springfield, VA, and online at <http://www.epa.gov/ncea/efh>.

**Figure S1.** Detail of sampling site in Sultan Alauddin Street, Makassar city, South Sulawesi, Eastern region Indonesia (a) PA (b) GR (c) PP (d) UP sites

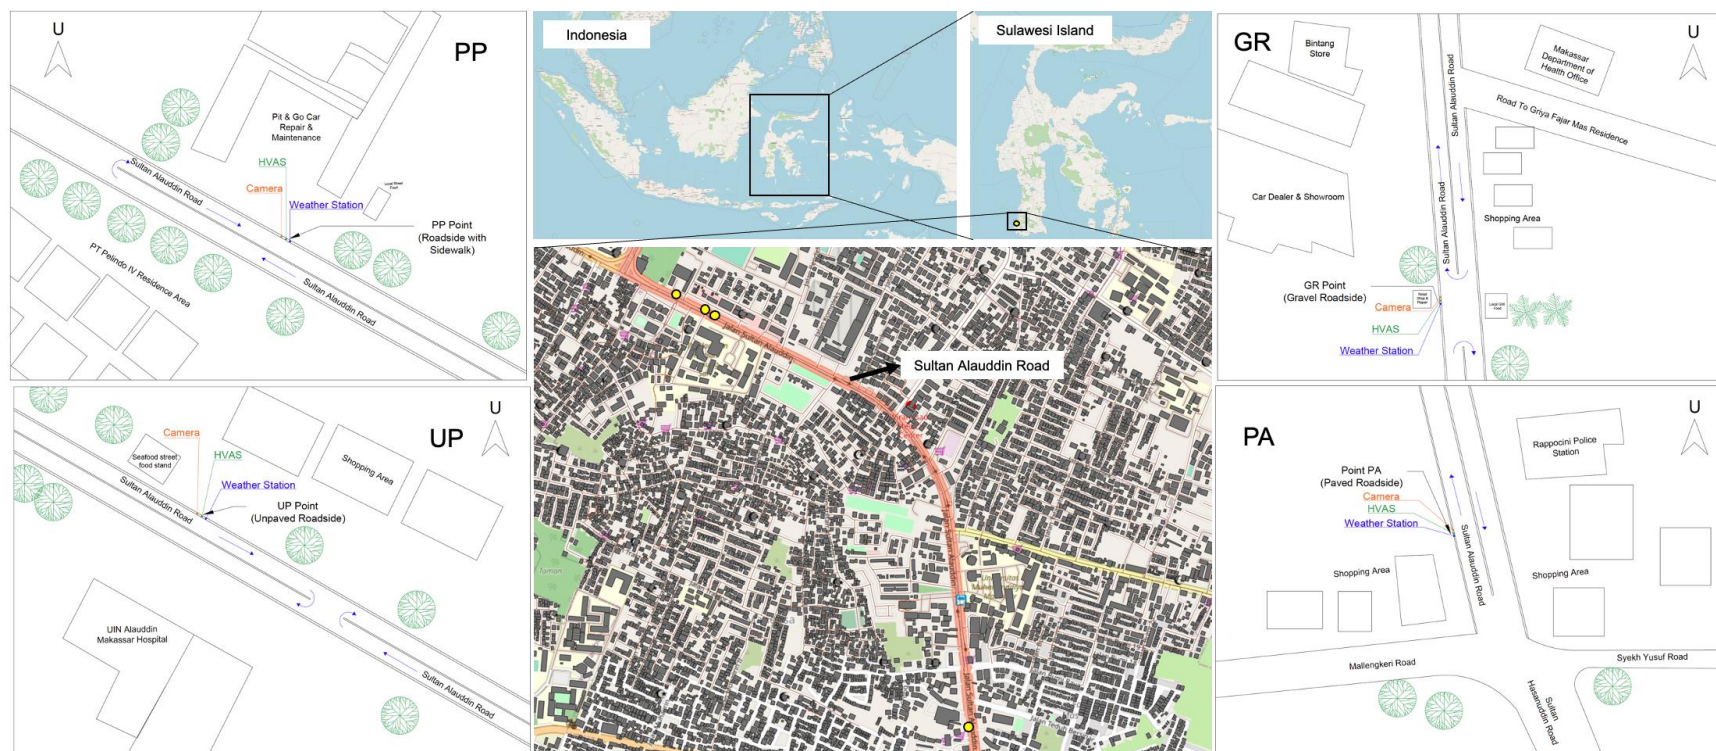

**Figure S2.** Pearson correlation between TSP, carbonaceous components, and meteorological condition at each sampling site in Sultan Alauddin Street, Makassar city, South Sulawesi, Eastern region Indonesia (a) PA (b) GR (c) PP (d) UP sites

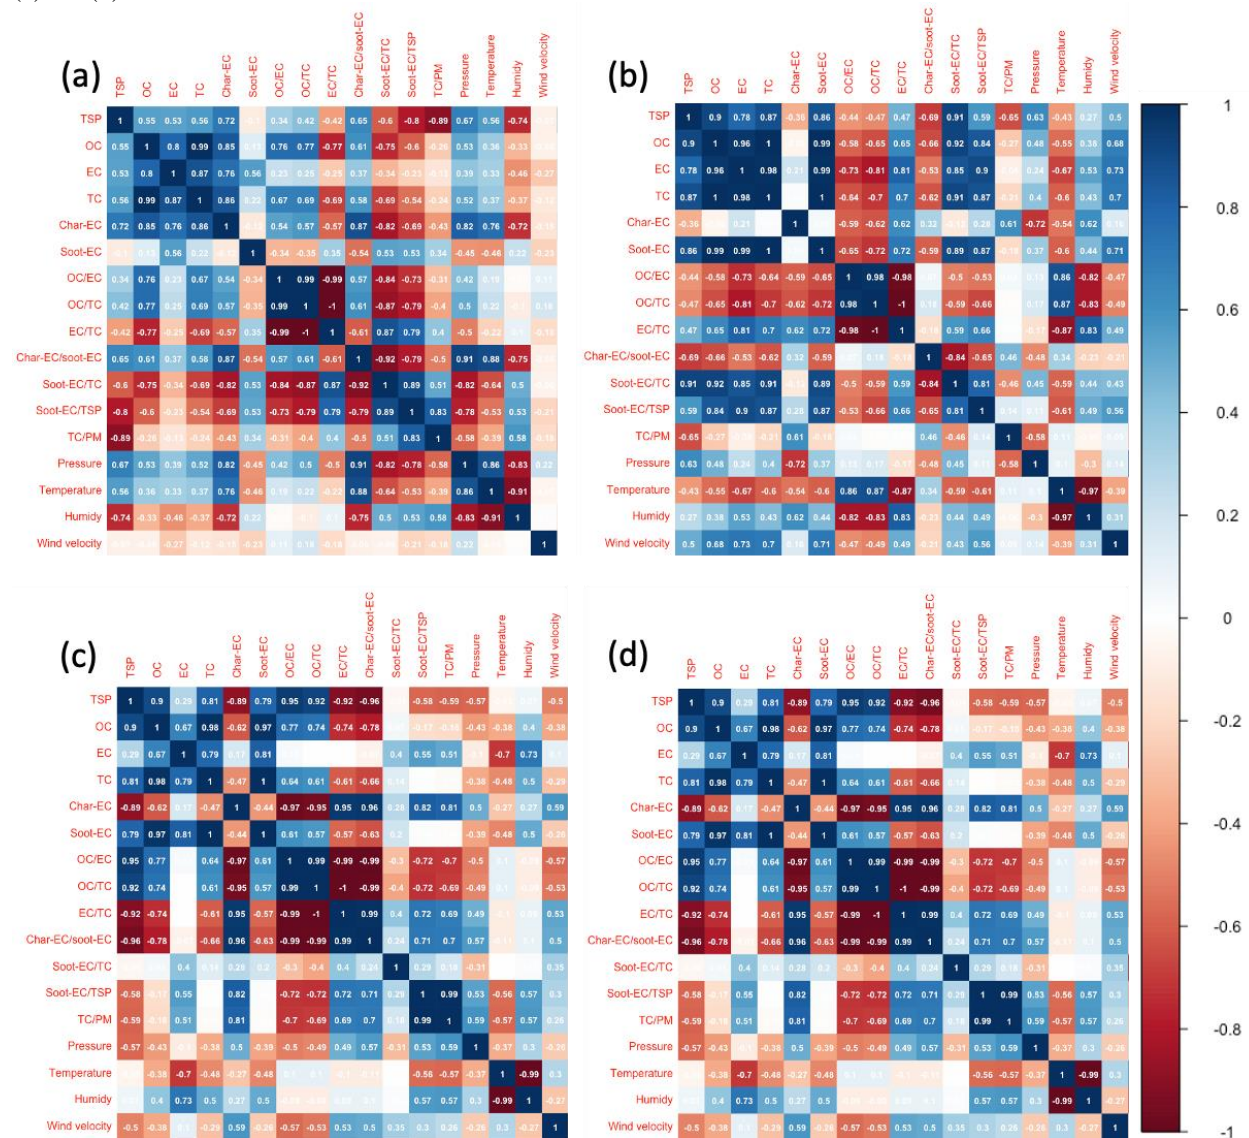

| Category | Item | Value |
|----------|------|-------|
| Chem-EC  | EC   | 1.0   |
|          | EC   | 1.0   |
|          | EC   | 1.0   |
|          | EC   | 1.0   |
| Chem-EC  | EC   | 1.0   |
|          | EC   | 1.0   |
|          | EC   | 1.0   |
|          | EC   | 1.0   |
| Chem-EC  | EC   | 1.0   |
|          | EC   | 1.0   |
|          | EC   | 1.0   |
|          | EC   | 1.0   |
| Chem-EC  | EC   | 1.0   |
|          | EC   | 1.0   |
|          | EC   | 1.0   |
|          | EC   | 1.0   |

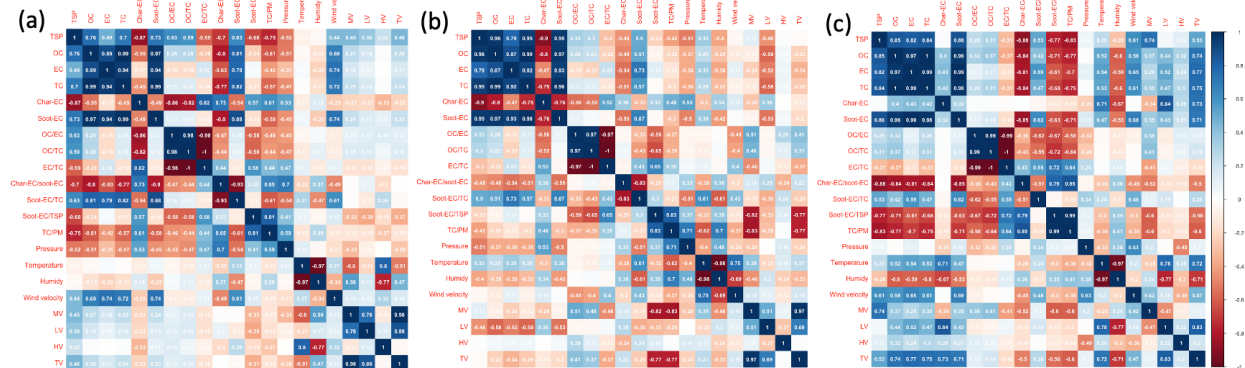



**Figure S4.** Air mass backward trajectory arrived at the sampling site in Sultan Alauddin Street, Makassar city, South Sulawesi, Eastern region Indonesia

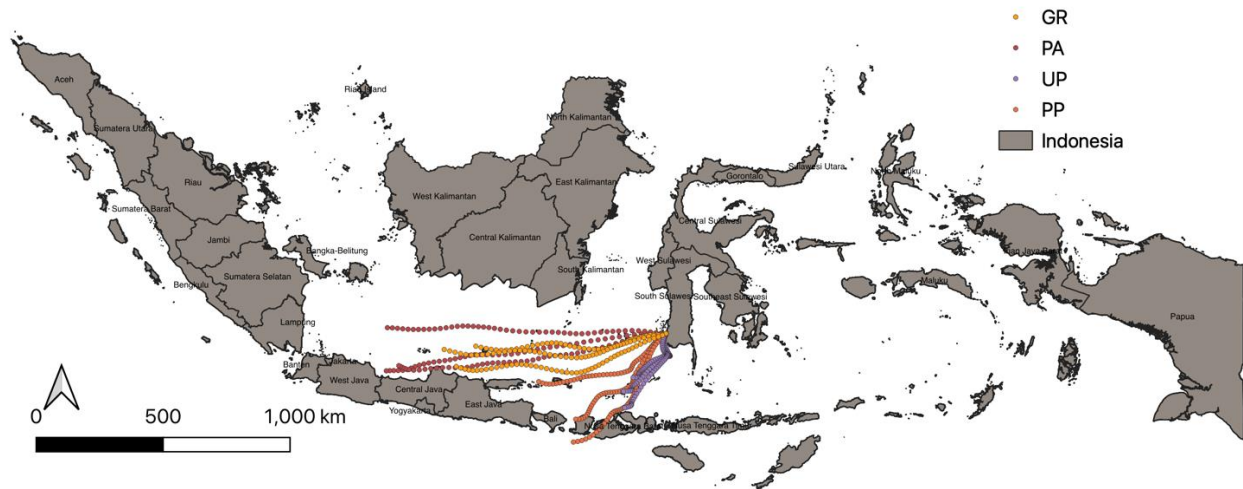

**Description:**

As shown in the figure **S4** above, there was no different in term of the sources of air mass arrived at the sampling sites which commonly originated from Southwest (SW) and west (W) of Makassar city and passing through ocean. Thus, the different of characteristic of TSP and its carbonaceous component might be related to the local characteristic.
